# Supplementary material
Source: PubMed Central journal article supplement (PMC4449822)
Supplement: NIHMS685406-supplement-supplement_1.pdf [file NIHMS685406-supplement-supplement_1.pdf]

1 **SUPPLEMENTAL MATERIALS:**

2 Materials and Methods

3 Supplemental Figures S1-S13

4 References (42-46)

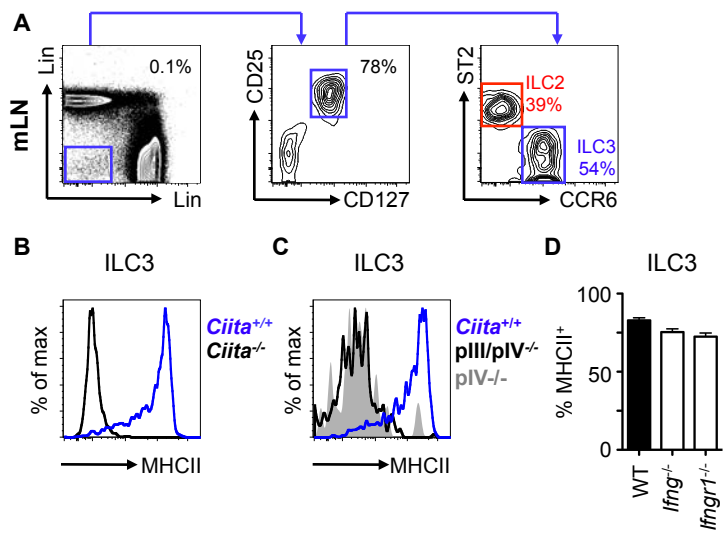

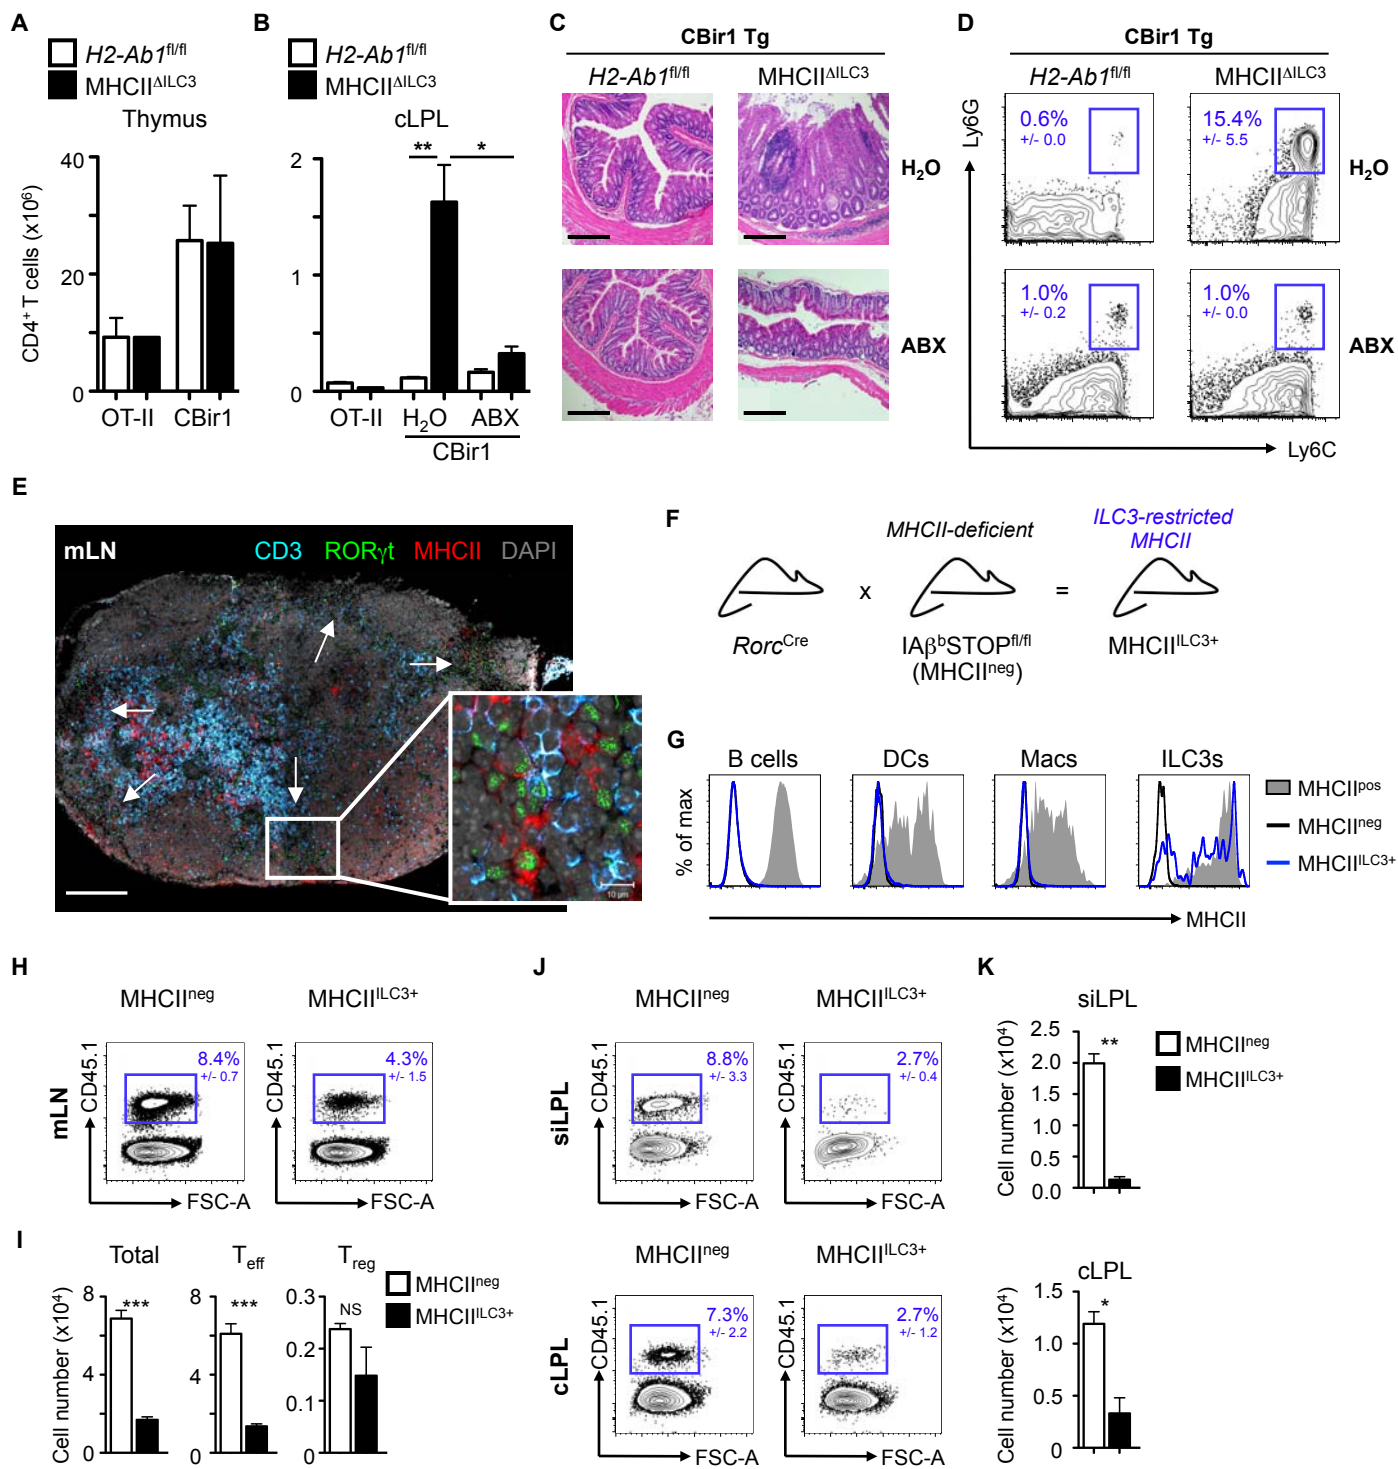

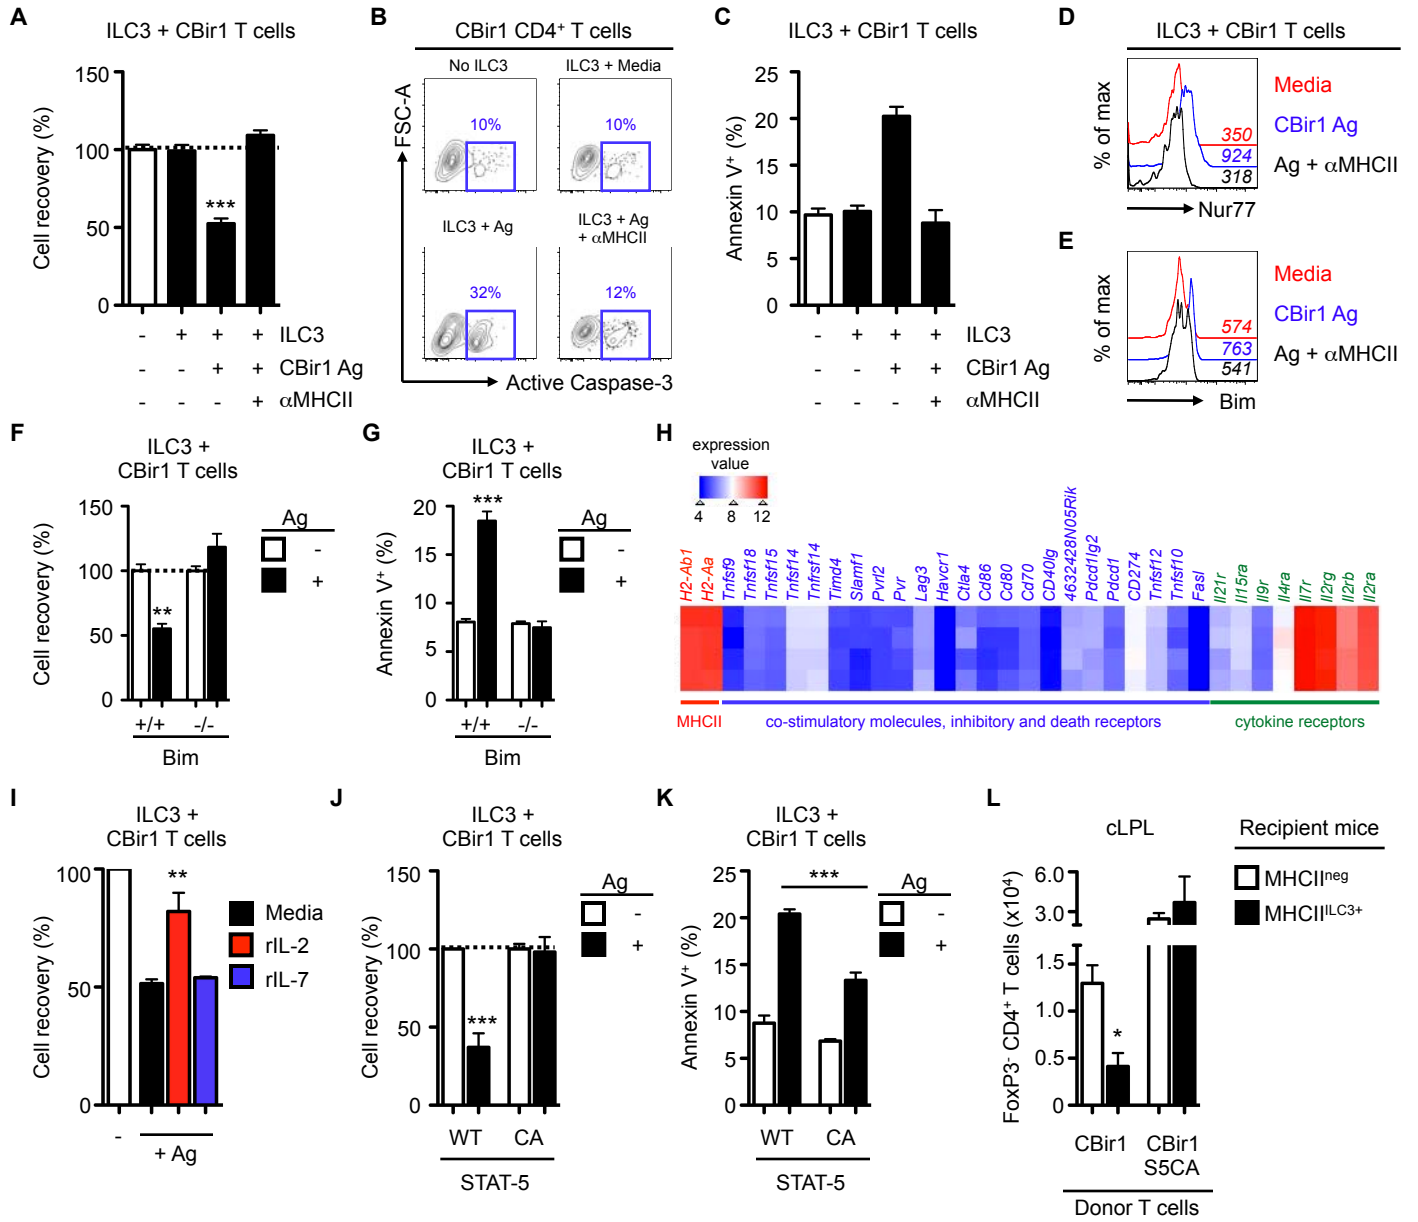

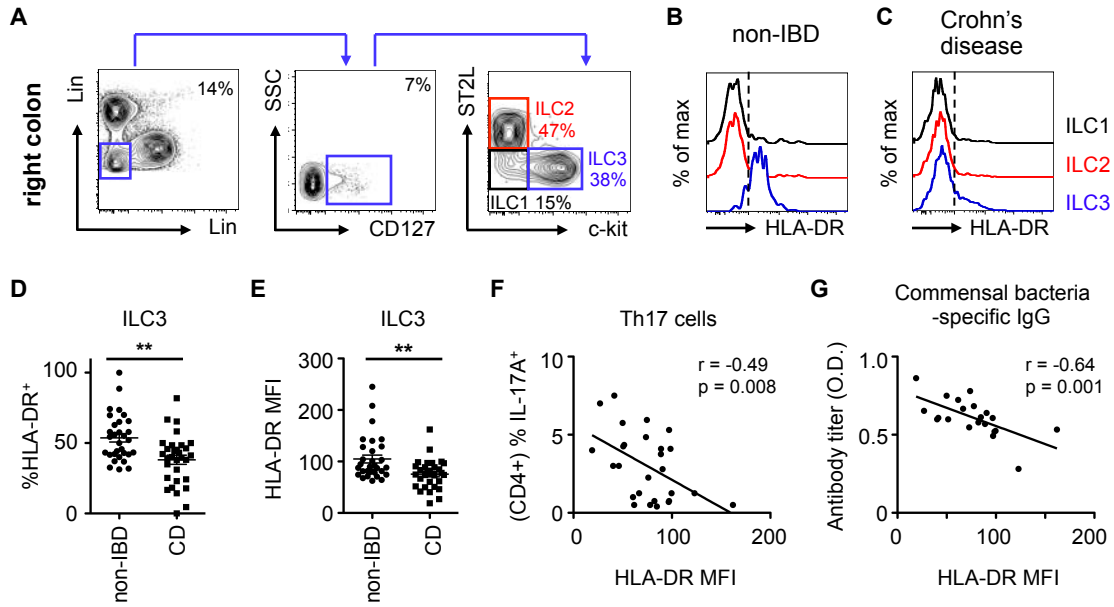

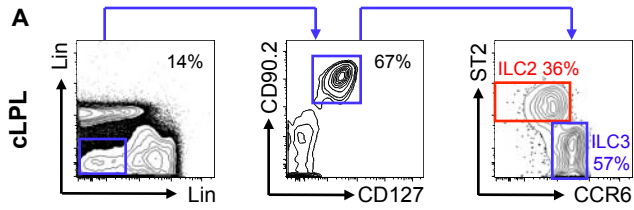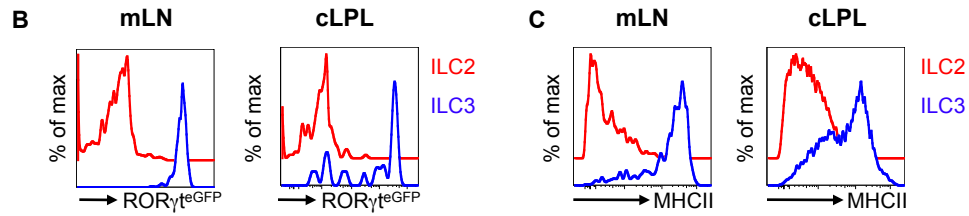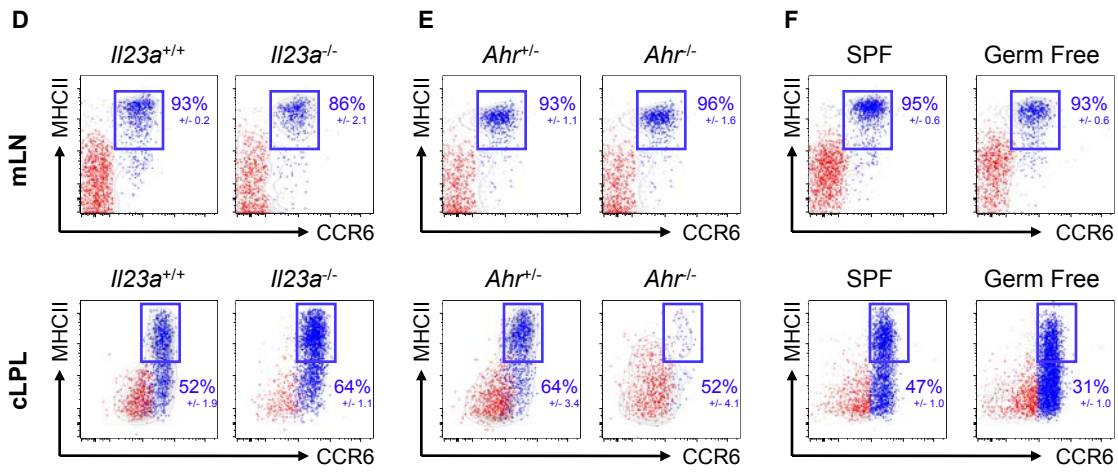

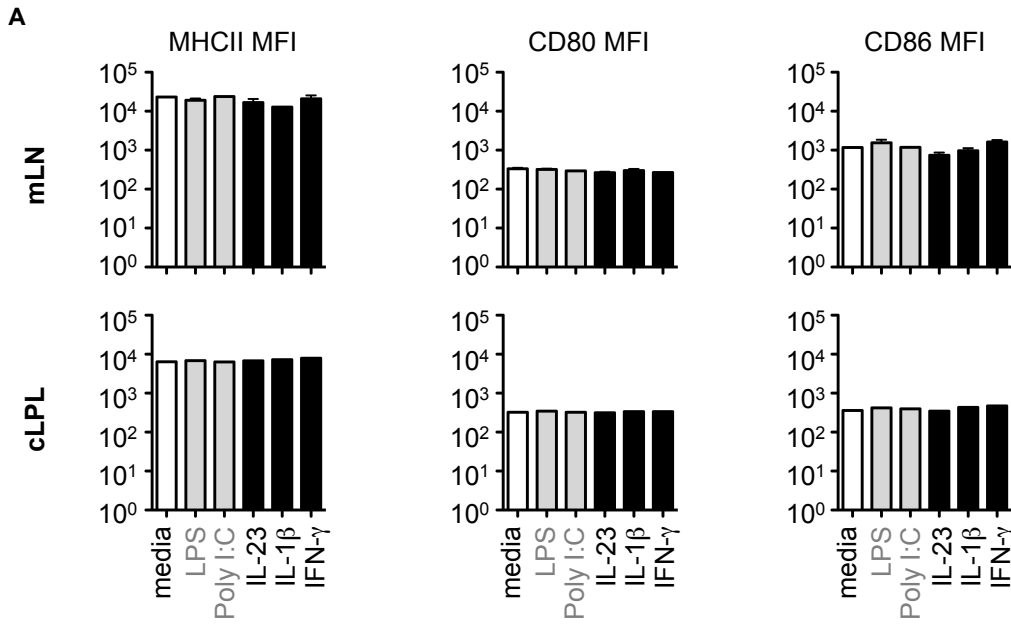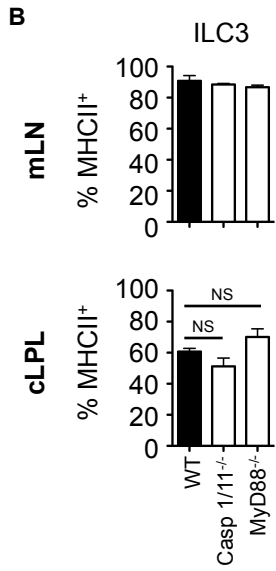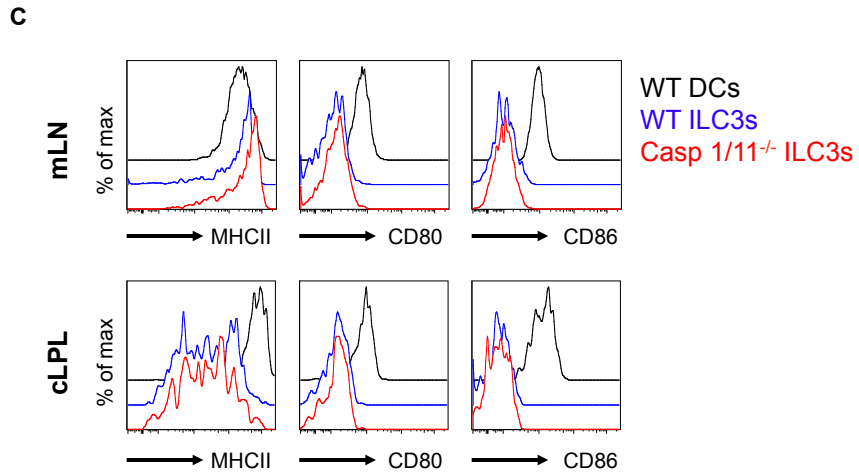

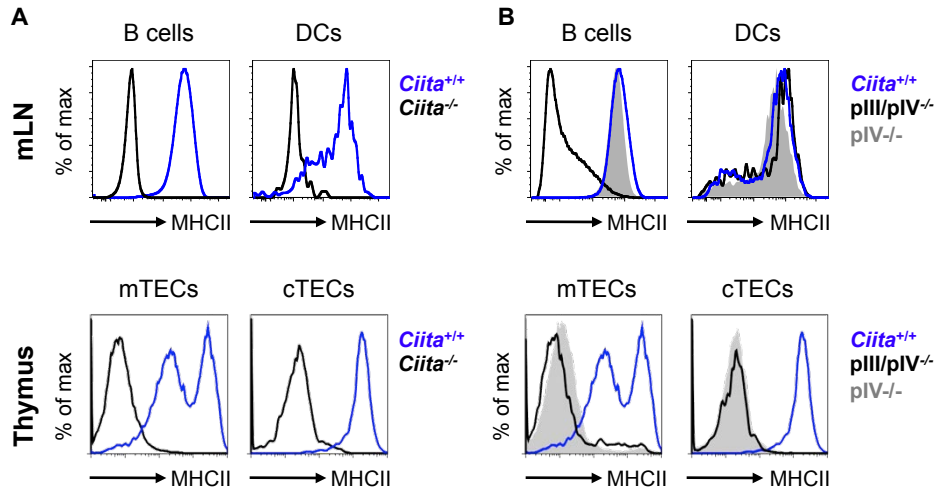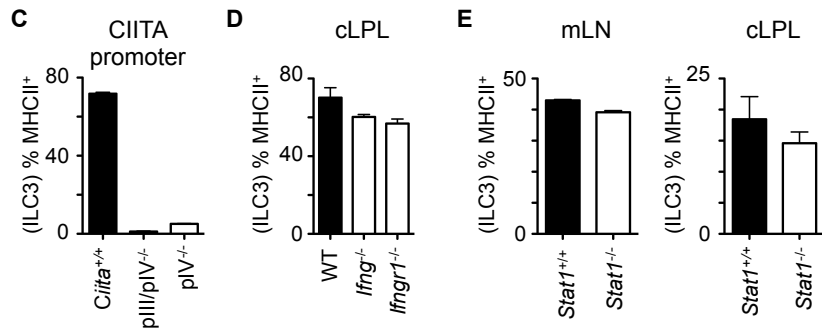



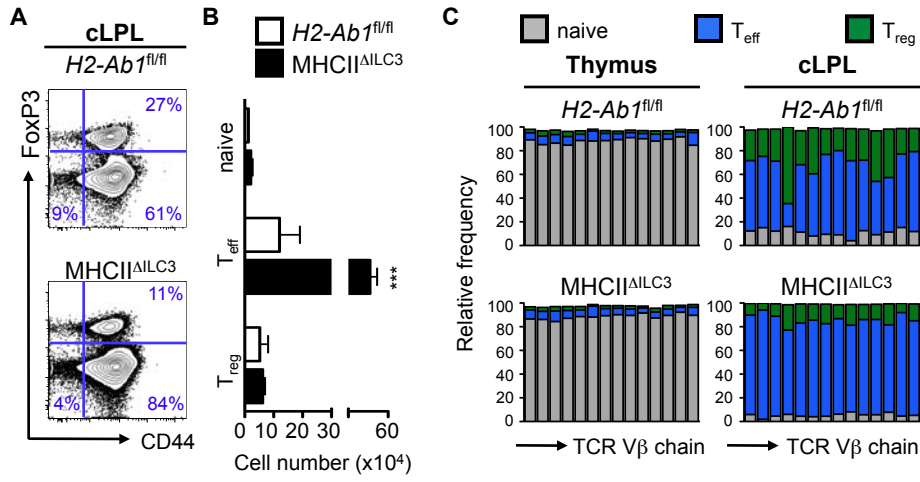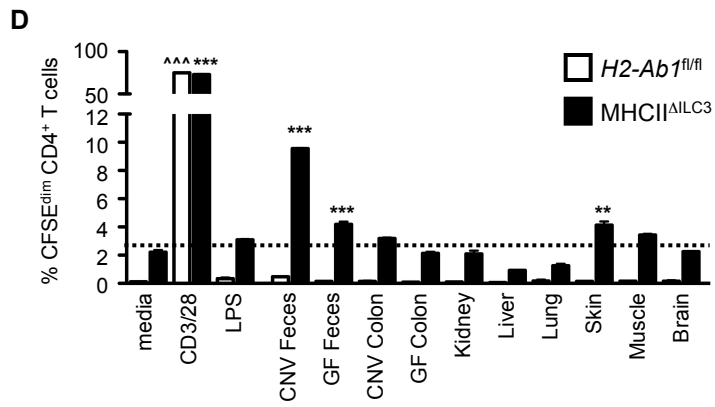

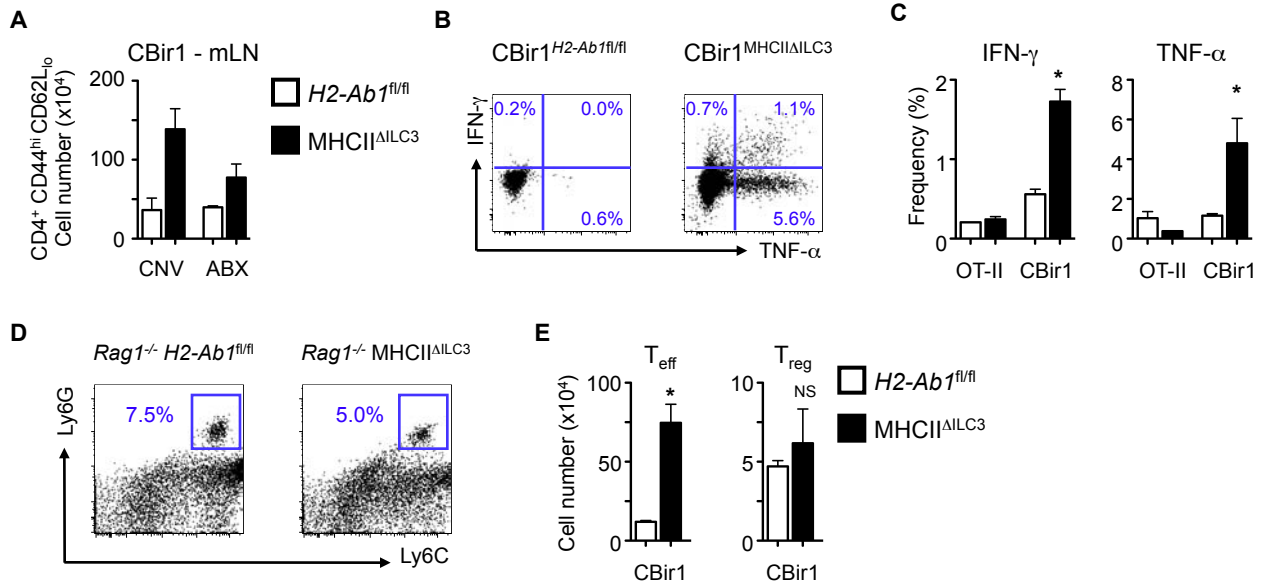

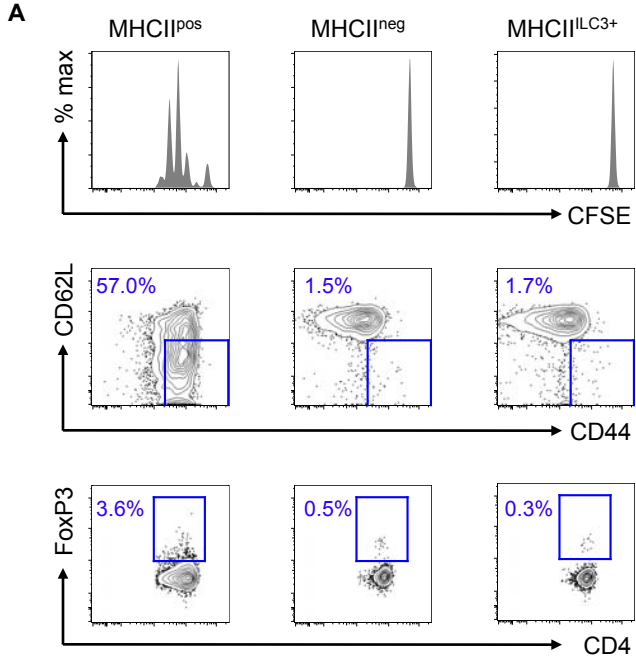

Naive CBir1 CD4<sup>+</sup> T cell Transfer

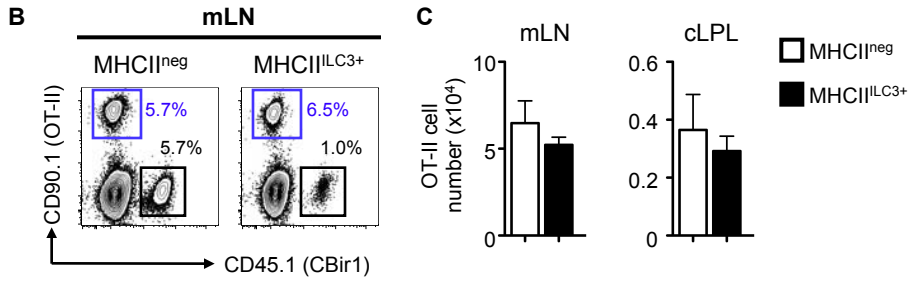

Activated CBir1 + OT-II  
CD4<sup>+</sup> T cell co-transfer

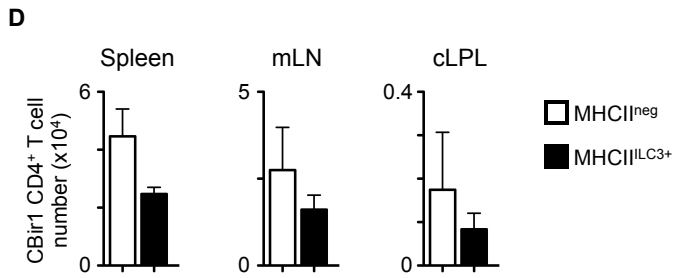

Activated CBir1 transfer  
No exogenous peptide

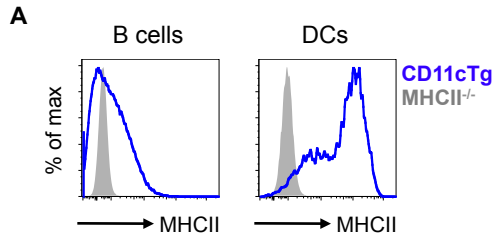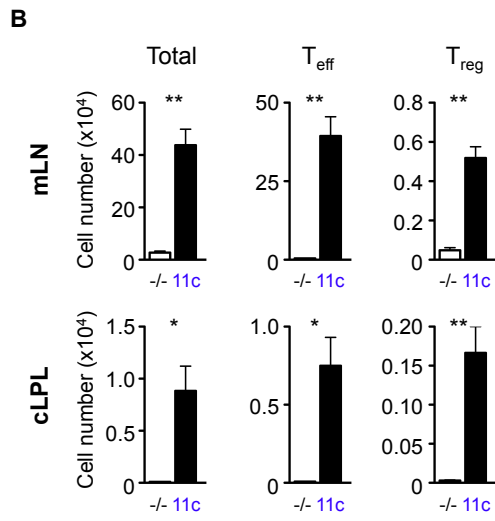

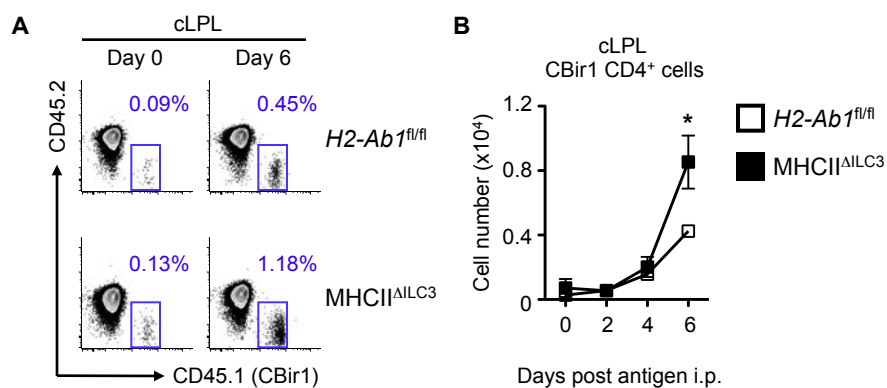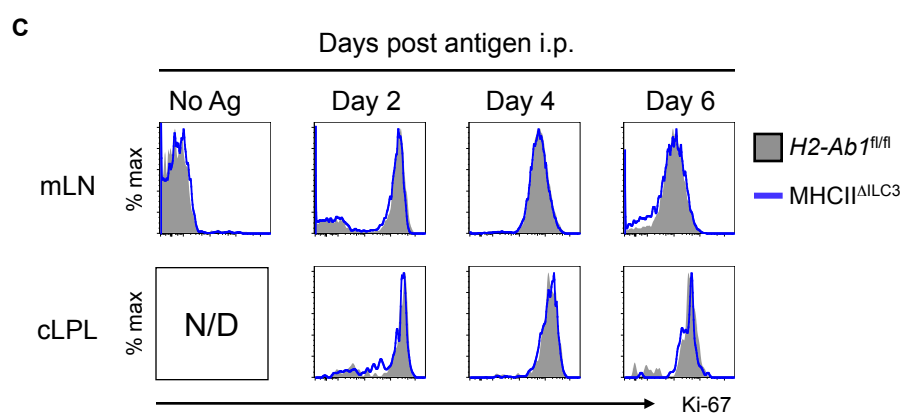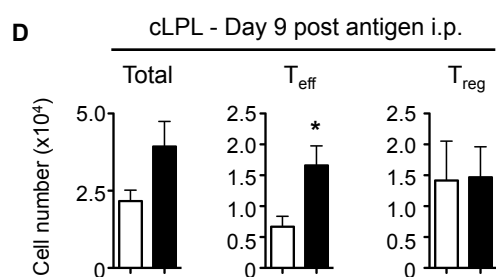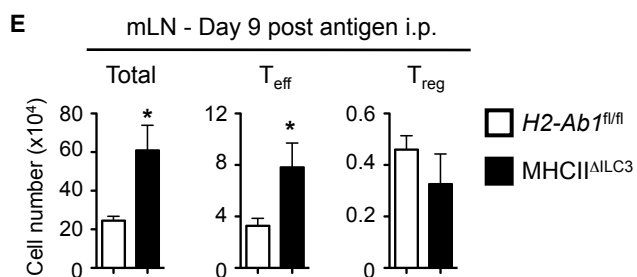

Activated CBir1 CD4<sup>+</sup> T cell adoptive transfer

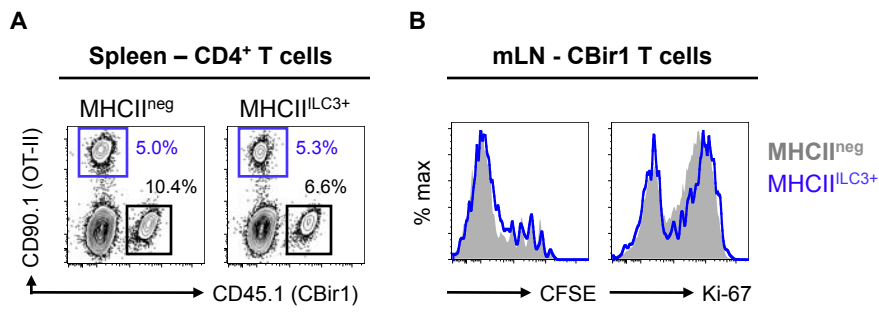

**A**

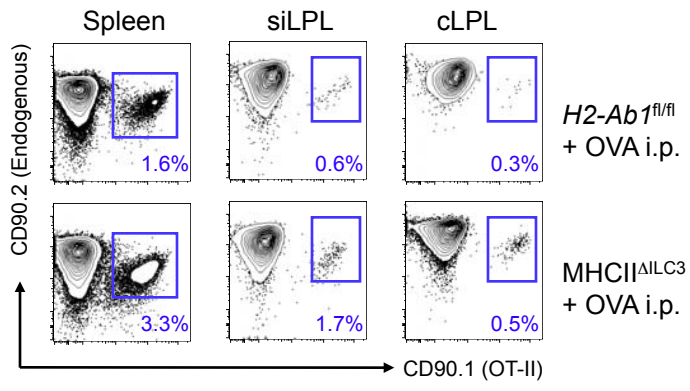

*In vivo*: Activated OT-II CD4<sup>+</sup> T cell Transfer

**B**

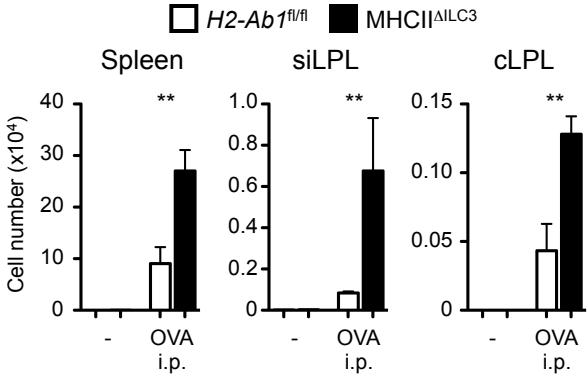

**C**

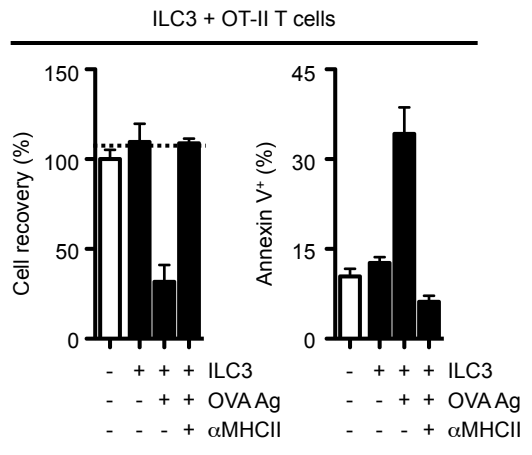

*In vitro*: Co-culture

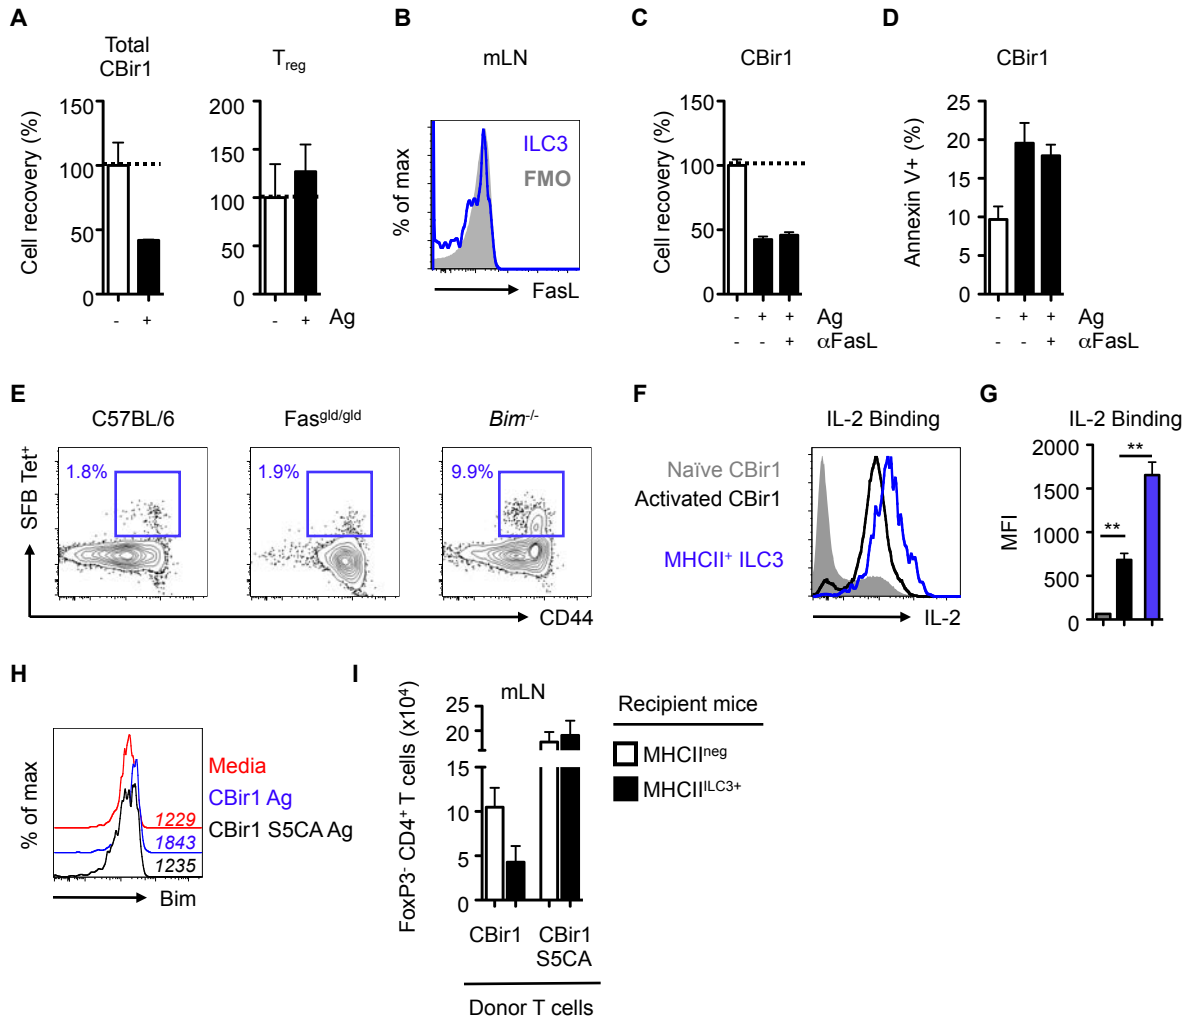



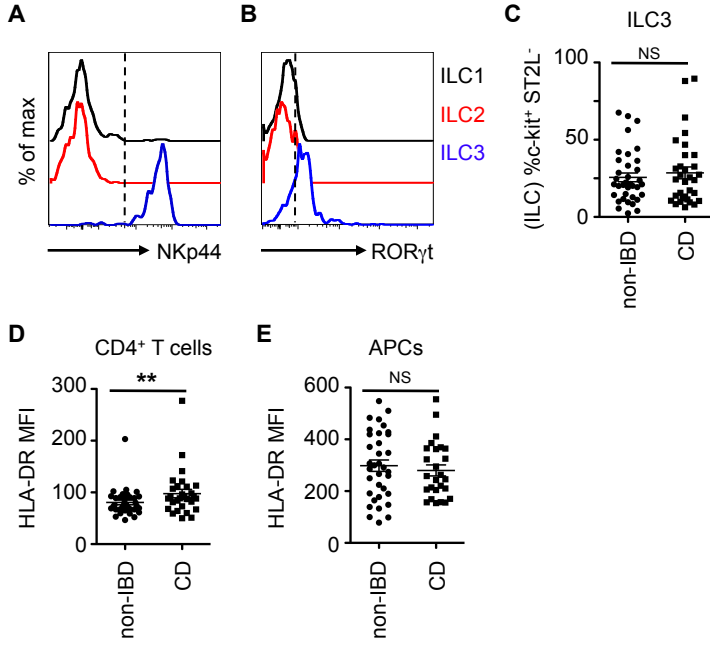

Fig. S13

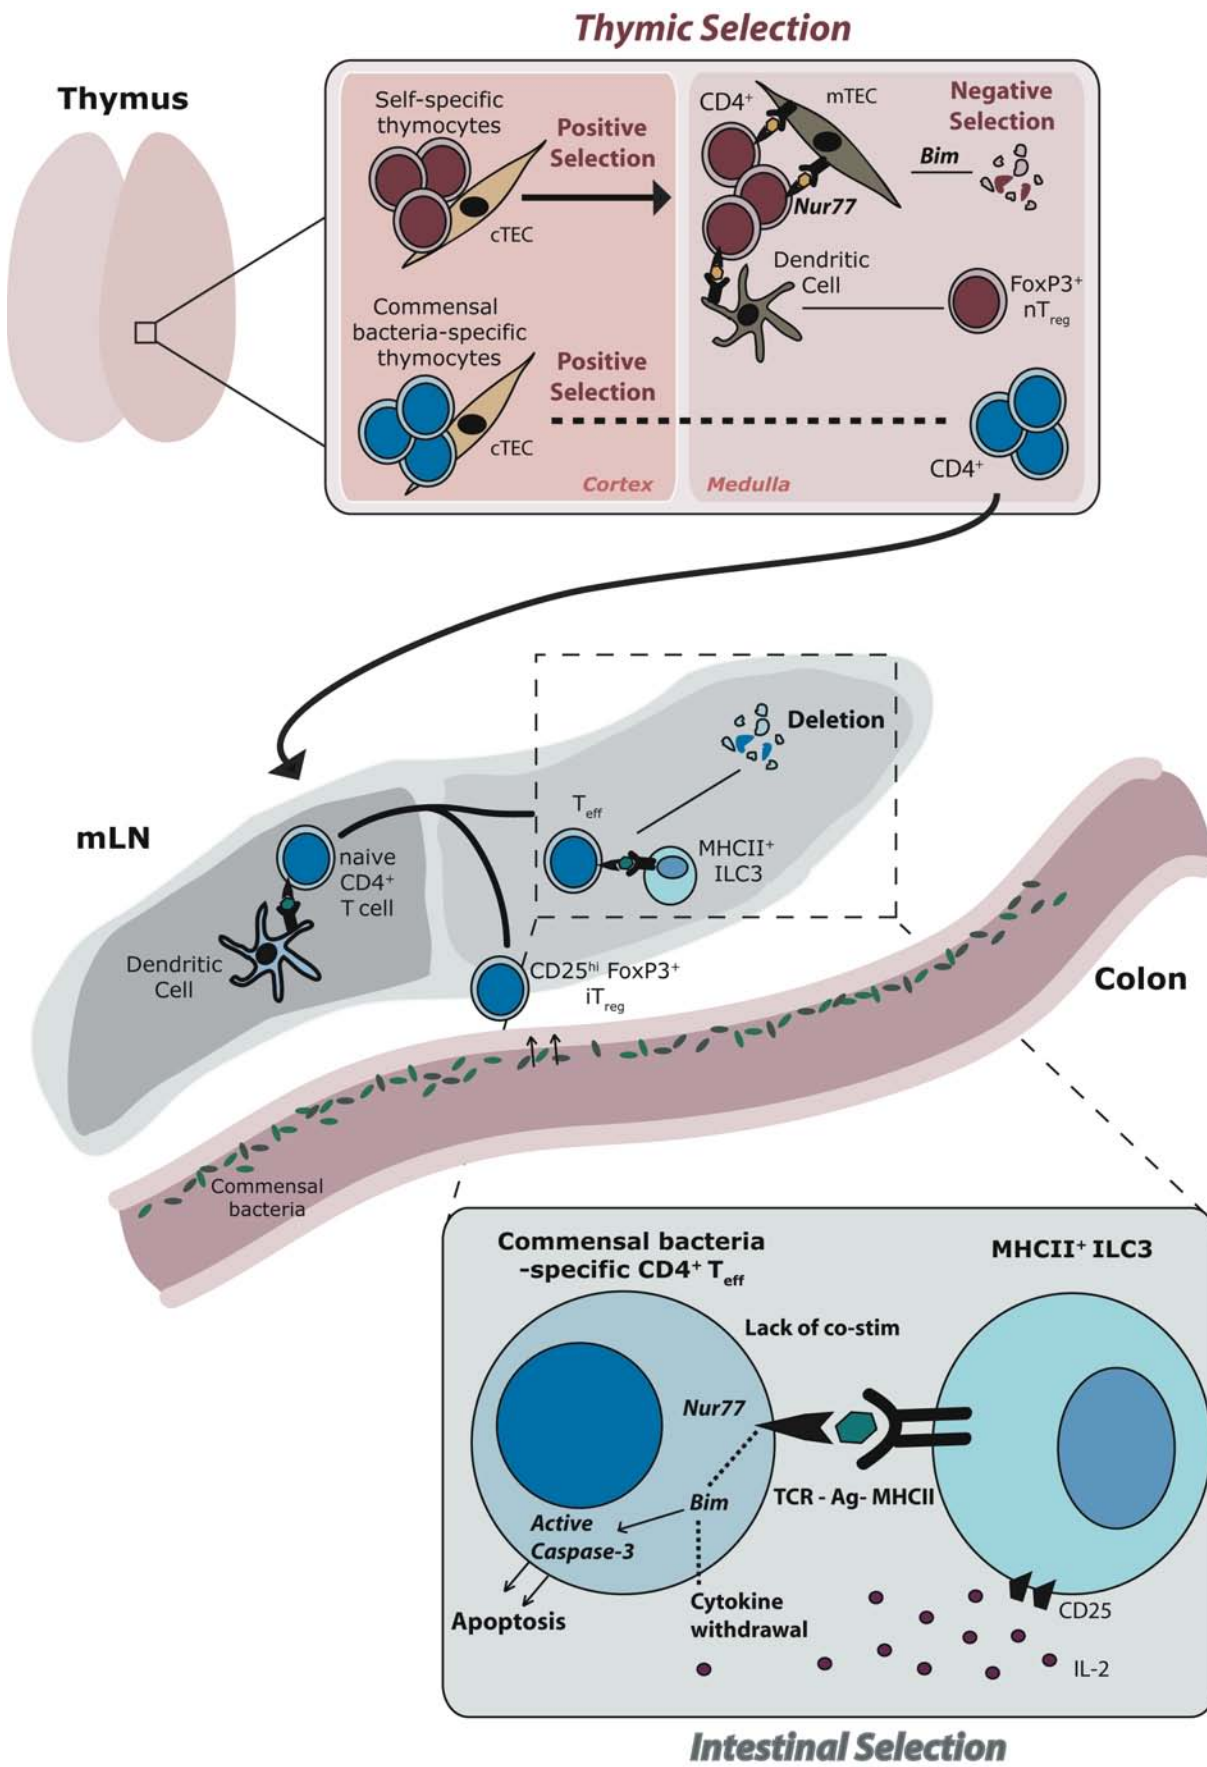

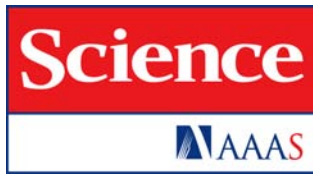

## Supplementary Materials for

### Group 3 innate lymphoid cells mediate intestinal selection of commensal bacteria-specific CD4<sup>+</sup> T cells

Matthew R. Hepworth, Thomas C. Fung, Samuel H. Masur, Judith R. Kelsen, Fiona M. McConnell, Juan Dubrot, David R. Withers, Stephanie Hugues, Michael A. Farrar, Walter Reith, Gerard Eberl, Robert N. Baldassano, Terri M. Laufer, Charles O. Elson, Gregory F. Sonnenberg

correspondence to: [gfonnenberg@med.cornell.edu](mailto:gfonnenberg@med.cornell.edu)

**This PDF file includes:**

Materials and Methods  
Figs. S1 to S13

## Materials and Methods

### Mice

Age- and sex-matched C57BL/6, OT-II, *Ciita*<sup>-/-</sup>, *Ifng*<sup>-/-</sup>, *Ifngr1*<sup>-/-</sup>, *Bim*<sup>-/-</sup>, *Fas*<sup>gld/gld</sup> and *Myd88*<sup>-/-</sup> mice were purchased from the Jackson Laboratory (Bar Harbor, ME) and *Stat1*<sup>+/+</sup> (129SvJ) and *Stat1*<sup>-/-</sup> mice were purchased from Taconic Farms. *Il23a*<sup>-/-</sup> mice were provided by Janssen Research and Development LLC and *Ahr*<sup>-/-</sup> mice were kindly provided by C. Hunter and S. Wagage (University of Pennsylvania). Caspase 1/11<sup>-/-</sup> were kindly provided by I. Brodsky (University of Pennsylvania). *Rorc*( $\gamma$ )-*Gfp*<sup>TG</sup> and *Rorc*<sup>Cre</sup> mice were provided by G. Eberl (Institut Pasteur, Paris, France) and MHCII <sup>$\Delta$ ILC3</sup> mice and *H2-Ab1*<sup>fl/fl</sup> littermate controls were generated as previously described (22). CD45.1<sup>+</sup> CBir1 TCR transgenic mice were kindly provided by C. Elson (University of Alabama at Birmingham, USA) and crossed with MHCII <sup>$\Delta$ ILC3</sup> mice to generate CBir1<sup>MHCII $\Delta$ ILC3</sup> mice. CBir1 mice were also crossed with *Bim*<sup>-/-</sup> (Jackson Laboratory) or STAT-5 constitutively active mice (S5CA; kindly provided by M. Farrar, University of Minnesota) where indicated. IA $\beta$ <sup>bSTOP</sup><sup>fl/fl</sup> mice (34), MHCII<sup>-/-</sup> and CD11cTg mice (42), were kindly provided by T. Laufer (University of Pennsylvania). All mice were maintained in specific pathogen-free facilities at Weill Cornell Medical College, New York and where appropriate mutant strains were co-housed with control littermates to ensure equivalent microbiota exposure. In some experiments, mice were administered a cocktail of broad-spectrum antibiotics in their drinking water *ad libitum* as previously described (22). Germ-free C57BL/6 mice were maintained at Weill Cornell Medical College, New York. *Ciita*<sup>+/+</sup> (C57BL/6), pIII/pIV<sup>-/-</sup> and pIV<sup>-/-</sup> mice were maintained at the University of Geneva, Switzerland and tissues were kindly provided by W. Reith and S. Hugues. All protocols were approved by the Weill Cornell Medical College Institutional Animal Care and Use Committees (IACUC), and all experiments were performed according to the guidelines of the relevant institution.

### Transgenic CD4<sup>+</sup> T cell adoptive transfers

In the majority of experiments, CBir1, CBir1 S5CA and/or OT-II CD4<sup>+</sup> T cells were enriched using MACs negative selection column enrichment (Miltenyi Biotech) and activated for 18 h at 5x10<sup>6</sup> cells/well in the presence of 0.5x10<sup>6</sup> antigen-presenting cells and 1  $\mu$ g/mL anti-CD3 and anti-CD28 monoclonal antibodies, prior to cell sorting on an Aria II (BD Biosciences). CD4<sup>+</sup> T cells were then sort-purified to >98% purity and transferred into 6-10 week old recipient hosts as indicated. In some experiments naïve T cells were sort-purified to >98% purity and 5x10<sup>6</sup> cells transferred without prior activation (naïve). Mice were then administered 50  $\mu$ g CBir1<sub>456-475</sub> peptide or OVA<sub>323-339</sub> peptide i.p. every two days post-transfer as indicated. In some experiments T cells were further CFSE-labeled prior to transfer. Recipient mice were euthanized 9-10 days following transfer and the presence of TCR transgenic T cells was quantified in the mLN, small intestinal lamina propria and colonic lamina propria.

### Murine tissue isolation and flow cytometry

Thymi and mLNs were harvested, and single-cell suspensions were prepared at necropsy. For intestinal lamina propria lymphocyte preparations, intestines were isolated, attached fat and Peyer's patches removed, and tissues cut open longitudinally. Luminal contents were removed by shaking in cold PBS. Epithelial cells and intra-epithelial lymphocytes were removed by shaking tissue in stripping buffer (1 mM EDTA, 1 mM DTT and 5% FCS) for 30 min at 37°C. The lamina propria layer was isolated by digesting the remaining tissue in 1.0 mg/mL collagenase/dispase (Roche) and 20 µg/mL DNase I (Sigma-Aldrich) for 30 min at 37°C. Thymic epithelial cells were stained in single-cell suspensions isolated from whole thymus by digestion in HBSS containing collagenase D (Roche) and DNase I (Sigma-Aldrich). Cell preparations were then depleted of CD45<sup>+</sup> cells using anti-CD45 magnetic beads and MACs column enrichment (Miltenyi Biotec).

For flow cytometric analyses, cells were stained with antibodies to the following markers (all antibodies from eBioscience unless otherwise stated): anti-CD45.1 (clone M5/114.15.2), anti-Thy1.1 (clone H1551), anti-TCR Vβ5 (clone MR9.4, BD Biosciences), anti-TCR Vβ8.3 (clone 8C1, BioLegend), NK1.1 (clone PK136), anti-CD3 (clone 145-2C11), anti-CD5 (clone 53-7.3), anti-CD127 (clone A7R34), anti-CD90.2 (clone 30-H12, BioLegend) anti-CD11c (clone N418), anti-F4/80 (clone BM8), anti-Ly6C (clone HK1.4), anti-Ly6G (clone RB6-8C5), anti-CD4 (clone GK1.5), anti-CD8 (clone 53-6.7), anti-B220 (clone RA3-6B2), anti-CD25 (clone eBio3C7), anti-CD80 (clone 16-10A1), anti-CD86 (clone GL1) anti-MHCII (clone M5/114.15.2), anti-CD44 (clone IM7), anti-CD62L (clone MEL-14), anti-CD45 (clone 30-F11), anti-CD11b (clone M1/70), anti-CD117 (c-kit) (clone 2B8), anti-Nur77 (clone 12.14), anti-Bim (clone C34C5, Cell Signalling), anti-FasL (clone MFL3) anti-ST2 (IL-33R) (clone DJ8, MDbioproducts), anti-CCR6 (clone 29-2L17, BioLegend), anti-Ki-67 (clone B56, BD Biosciences), anti-EpCAM1 (clone G8.8, BioLegend) and anti-Ly5.1 (clone 6C3, BioLegend). For intracellular staining, cells were fixed and permeabilized utilizing a commercially available kit (eBioscience) and stained with anti-FoxP3 (clone FJK016s). For cytokine production, cells were stimulated *ex vivo* by incubation for 4 h with 50 ng/mL PMA, 750 ng/mL ionomycin, 10 µg/mL Brefeldin A (all obtained from Sigma-Aldrich) and permeabilized as indicated above and stained with anti-IFN-γ (clone XMG1.2) and anti-TNF-α (clone MP6-XT22). Dead cells were excluded from analysis using a violet viability stain (Invitrogen). T cell receptor Vβ chains were assessed using a commercial mouse TCR Vβ screening panel (BD Biosciences). SFB-specific CD4<sup>+</sup> T cell responses were measured in pooled gut-associated lymphoid tissues (mLN, Peyer's patches, siLPL and cLPL) using a specific MHCII-tetramer (IA<sup>b</sup>/3340-A6), as previously described (31, 43). IL-2 binding capacity was assessed using a biotinylated IL-2 Fluorokine assay kit (R&D Systems), following manufacturer's instructions. Flow cytometry data collection was performed on an LSR II (BD Biosciences) and cell sorting was performed on an Aria II (BD Biosciences). Data were analyzed using FlowJo software (Tree Star Inc.).

### *In vitro* ILC3-T cell co-culture assays

Lineage<sup>neg</sup> CD127<sup>+</sup> CCR6<sup>+</sup> ILC3s were sort-purified from the mLN of C57BL/6 mice and 5x10<sup>3</sup> ILC3s were pulsed with 10 µg/mL CBir1 peptide, or OVA peptide where

indicated, in a 96-well plate for 1 h at 37°C/5% CO<sub>2</sub>. Where indicated, antigen-pulsed ILC3s were further cultured in the presence of 1 µg/mL anti-MHCII (clone M5/114.15.2, eBioscience) or anti-FasL (clone MFL3, eBioscience). Whole mLN and splenic lymphocytes from CBir1 and OT-II mice were pre-activated with 10 µg/mL cognate antigen for 24 h prior to culture. Subsequently, T cells (CD3<sup>+</sup> CD5<sup>+</sup> CD4<sup>+</sup>) were sort-purified and plated at 10x10<sup>3</sup> cells per well in the presence or absence of ILC3s and co-cultured for 48 h. Prior to staining for flow cytometric analysis, cells were spiked with 1x10<sup>6</sup> congenic (CD90.1) splenocytes to allow for reproducible recovery and analysis. Cell recovery was assessed using a known number of counting beads (AccuCheck, Molecular Probes). Cells were further assessed for apoptosis via quantification of active Caspase-3 (CaspGlow kit, eBioscience) or PE-Cy7 conjugated Annexin V (eBioscience).

#### In vitro stimulation assays

Lymphocyte preparations from naïve C57BL/6 mLN or cLPL were prepared as described above, 1x10<sup>6</sup> cells/well plated in a 96-well plate in FCS-containing media and stimulated with media alone or 1 µg/mL LPS, 25 µg/mL Poly I:C, 100 ng/mL IL-23, 100 ng/mL IL-1β or 100 ng/mL IFN-γ for 48 h. MHCII and co-stimulatory molecules were then assessed by flow cytometry by gating on CCR6<sup>+</sup> ILC3. In other experiments, CD4<sup>+</sup> T cells were sort-purified from the spleen and mLN of MHCII<sup>ΔILC3</sup> mice and *H2-Ab1<sup>fl/fl</sup>* littermate controls, CFSE labeled, plated at a density of 2x10<sup>6</sup> cells/well in a 24 well plate and stimulated with 50 µg/mL of fecal or tissue antigen preparations as indicated. Antigen preparations were generated by sterile dissection of peripheral tissues, with subsequent removal of colon and fecal content, and homogenized in PBS containing protease inhibitors and EDTA, followed by three rounds of sonication for 30 seconds at 50% amplitude. Debris was then pelleted by centrifugation at 12,000 x g, the soluble protein-containing supernatant was extracted and subjected to two freeze-thaw cycles and protein concentrations quantified using a Nanodrop 2000 (Thermo Scientific).

#### Human samples and flow cytometry

Human intestinal tissues from the right colon and left colon were obtained from the Children's Hospital of Philadelphia following an IRB-approved protocol. Single cell suspensions from intestinal tissues were obtained by incubating biopsies for 30 min at 37°C with shaking in stripping buffer (1 mM EDTA, 1 mM DTT and 5% FCS) to remove the epithelial layer. Supernatants were then discarded, and the lamina propria fraction was obtained by incubating the remaining tissue for 30 min at 37°C with shaking in digestion solution (0.5 mg/mL collagenase/dispase and 20 µg/mL DNase I). Remaining tissues were then mechanically dissociated and filtered through a 70 µm cell strainer. All cells were then viably cryopreserved in 90% FBS and 10% DMSO for side-by-side analysis at a later time point. Following thawing, cells were stained with antibodies to the following markers (all antibodies from eBioscience unless otherwise stated): anti-CD3 (clone UCHT1), anti-CD4 (clone OKT-4), anti-CD5 (clone UCHT2), anti-CD11b (clone M1/7B), anti-CD11c (clone 3.9), anti-CD14 (clone 61D3), anti-CD19 (clone 2H7), anti-HLA-DR (clone LN3), anti-CD127 (clone A019D5, Biolegend), anti-FcεRI (clone AER-37), anti-CD117 (c-kit) (clone 104D2), anti-ST2L (clone B4E6, MDbioproducts) and anti-NKp44 (clone Z231, BC Cytometry). For intracellular staining, cells were fixed and permeabilized utilizing a commercially available kit (eBioscience) and stained with

anti-IL-17A (clone eBio64DEC17) and anti-ROR $\gamma$ t (clone AFKJS-9). Dead cells were excluded from analysis using a viability stain (Invitrogen). Flow cytometry data was collected using a LSR II (BD Biosciences). Data were analyzed using FlowJo software (Tree Star Inc.).

#### Immunofluorescence and histology

Sections of mLN were prepared and stained for ROR $\gamma$ t and CD3 expression as previously described (44). Expression of MHCII was detected using anti-mouse I-A/I-E antibody conjugated to Alexa Fluor 647 (clone M5/114.15.2, Biolegend). Images were acquired with a Zeiss 780 Zen microscope and analyzed using Zen software (Zeiss). For histological analyses, sections of colon and other tissues were paraffin embedded, sectioned and stained with H&E as previously described (22). Images were acquired with a Nikon Eclipse TI microscope, using manufacturer's software.

#### Commensal bacteria-specific ELISA

Commensal bacterial antigen was generated as previously described (45). Briefly, colonic fecal contents from *Rag1*<sup>-/-</sup> mice were homogenized and centrifuged at 1,000 rpm to remove large aggregates, and the resulting homogenate was washed with sterile PBS twice by centrifuging for 1 min at 8,000 rpm. On the last wash, bacteria were resuspended in 2 mL ice-cold PBS and sonicated on ice. Samples were then centrifuged at 20,000 x g for 10 min, and supernatants were recovered for a crude commensal bacteria antigen preparation. For measurement of serum antibodies by ELISA, 5  $\mu$ g/mL commensal bacteria antigen was coated on 96-well plates, and sera were incubated in doubling dilutions. Antigen specific IgG was detected using an anti-human IgG-HRP antibody (BD Biosciences). Plates were developed with TMB peroxidase substrate (KPL), and optical densities were measured using a plate spectrophotometer.

#### Microarray

CCR6<sup>+</sup> ILC3s were sort-purified from mLN by gating on lineage-negative, CD127<sup>+</sup>, CD25<sup>+</sup>, ST2<sup>-</sup>, CCR6<sup>+</sup> cells. RNA purification and arrays were performed as previously described (46). Microarray gene expression data was deposited at GEO (accession number GSE67076).

#### Statistical analyses

Results represent mean  $\pm$  s.e.m. Statistical analyses were performed by Student's t-test or one-way ANOVA unless specified otherwise.

**Fig. S1.**

**fig. S1. MHCII expression of mLN and cLPL group 3 ILCs is independent of IL-23, Ahr and the intestinal microbiota.** **A)** Colonic lamina propria cells from naïve mice were gated as CD45<sup>+</sup> and lineage (x-axis; CD3, CD5, CD8, NK1.1, y-axis; B220, CD11c, CD11b) negative and CD127<sup>+</sup> and further divided by expression of ST2 (ILC2s; red) or CCR6 (ILC3s; blue) and expression of **B)** RORγt<sup>eGFP</sup> or **C)** MHC class II was determined on mLN and cLPL ILC3s. Expression of MHCII on ILC2s (red) and ILC3s (blue) in mice deficient in **D)** IL-23p19 **E)** Aryl hydrocarbon receptor (Ahr) or **F)** intestinal microbiota from the mLN (top panel) and cLPL (bottom panel). Gate shows frequency of MHCII expression amongst gated ILC3s (blue). All data representative of at least 3 independent experiments with at least n=3 mice per group. SPF, specific pathogen free. Results are shown as the mean +/- s.e.m.



**Fig. S2.**

**fig. S2. MHCII and co-stimulatory molecule expression of mLN ILC3s is unaffected by TLR ligands or pro-inflammatory cytokines.** **A)** Mean fluorescent intensity of ILC3 MHCII, CD80 and CD86 from mLN or cLPL cells stimulated with media alone, TLR ligands (LPS, Poly I:C) or pro-inflammatory cytokines (IL-23, IL-1 $\beta$ , IFN- $\gamma$ ). **B)** Frequency of MHCII<sup>+</sup> (Lin<sup>-</sup> CD127<sup>+</sup> CCR6<sup>+</sup>) ILC3s in the mLN (top panel) and cLPL (bottom panel) of Capase 1/11<sup>-/-</sup> and MyD88<sup>-/-</sup> mice. **C)** Representative histograms depicting expression of MHCII, CD80 and CD86 on WT C57BL/6 DCs (black line), WT ILC3s (blue line) or Capase 1/11<sup>-/-</sup> ILC3s (red line) in the mLN (top panel) or cLPL (bottom panel). All data representative of at least 3 independent experiments with 3-4 mice per group or 3 biological replicates. Results are shown as the mean +/- s.e.m.

**Fig. S3.**

**fig. S3. CIITA transcriptional control of MHCII expression on B cells, DCs and TECs and IFN- $\gamma$  dependence of MHCII expression in colonic ILC3s.** Expression of MHCII was determined on B220<sup>+</sup> CD11c<sup>-</sup> B cells or CD11b<sup>+</sup> CD11c<sup>hi</sup> DCs from the mLN or CD45<sup>-</sup> EpCAM<sup>+</sup> Ly51<sup>-/low</sup> mTECs or CD45<sup>-</sup> EpCAM<sup>+</sup> Ly51<sup>+</sup> cTECs from the thymus of mice deficient in **A)** CIITA and **B)** CIITA-specific promoters (pIII/pIV, pIV). MHCII expression on **C)** mLN CCR6<sup>+</sup> ILC3s from mice deficient CIITA in promoter regions (pIII/pIV, pIV) **D)** cLPL CCR6<sup>+</sup> ILC3s from IFN- $\gamma$  or IFN- $\gamma$ R1-deficient mice and **E)** mLN and cLPL CCR6<sup>+</sup> ILC3s from STAT-1 deficient mice. All data representative of at least 3 independent experiments with n=2-3 mice per group. Results are shown as the mean +/- s.e.m.

**Fig. S4.**

**fig. S4. ILC3-intrinsic MHCII selectively controls commensal bacteria-specific CD4<sup>+</sup> T effector cells in the intestine.** **A)** Relative frequencies and **B)** total cell numbers of naïve (CD44<sup>lo</sup>), T<sub>eff</sub> (CD44<sup>hi</sup>) and T<sub>reg</sub> (FoxP3<sup>+</sup>) CD4<sup>+</sup> T cells in the colonic lamina propria of MHCII<sup>ΔILC3</sup> mice or H2-Ab1<sup>fl/fl</sup> littermate controls. **C)** Analysis of the frequencies of naïve (grey), T<sub>eff</sub> (blue) and T<sub>reg</sub> (green) amongst CD4<sup>+</sup> T cells expressing commonly utilized TCR Vβ chains in the thymus and colonic lamina propria of MHCII<sup>ΔILC3</sup> mice or H2-Ab1<sup>fl/fl</sup> littermate controls. **D)** Frequency of proliferating cells (CFSE<sup>dim</sup>) in CD4<sup>+</sup> T cells derived from MHCII<sup>ΔILC3</sup> mice or H2-Ab1<sup>fl/fl</sup> littermate controls and stimulated with fecal and tissue-derived homogenate antigens in vitro for 72 h. All data representative of at least 2 independent experiments with 3 biological replicates or n=3 mice per group. Results are shown as the mean +/- s.e.m. Data was analyzed by student's t-test (B) or one-way ANOVA (D). \*\* p≤0.01 and \*\*\* p≤0.001, ^^^ indicates p≤0.001 for H2-Ab1<sup>fl/fl</sup> comparisons versus matched media control.

**Fig. S5.**

**fig. S5. ILC3-intrinsic MHCII selectively controls CBir1 CD4<sup>+</sup> T effector cells in the intestine.** OT-II or CBir1 TCR transgenic mice were crossed with either MHCII<sup>ΔILC3</sup> mice or H2-Ab1<sup>fl/fl</sup> littermate controls and total Vβ5<sup>+</sup> (OT-II) or Vβ8.3<sup>+</sup> (CBir1) CD4<sup>+</sup> T cell numbers were determined. **A)** CBir1 CD4<sup>+</sup> T cell numbers in the mLN of conventional or ABX-treated CBir1 transgenic mice crossed with either MHCII<sup>ΔILC3</sup> mice or H2-Ab1<sup>fl/fl</sup> littermate controls. **B-C)** Frequencies of IFN-γ<sup>+</sup> and/or TNF-α<sup>+</sup> T cells following stimulation with cognate antigen, OVA peptide (OT-II) or CBir1 peptide (CBir1), for 5 h in the presence of Brefeldin A. **D)** Frequencies of CD45<sup>+</sup> CD3<sup>-</sup> B220<sup>-</sup> Ly6C<sup>+</sup> Ly6G<sup>+</sup> neutrophils in the cLPL of Rag1<sup>-/-</sup> MHCII<sup>ΔILC3</sup> mice or Rag1<sup>-/-</sup> H2-Ab1<sup>fl/fl</sup> littermate controls. **E)** Number of CD4<sup>+</sup> T<sub>eff</sub> or T<sub>reg</sub> in the colonic lamina propria of CBir1 transgenic mice crossed with either MHCII<sup>ΔILC3</sup> mice or H2-Ab1<sup>fl/fl</sup> littermate controls. All data representative of at least 3 independent experiments with n=2-3 mice per group. Results are shown as the mean +/- s.e.m. \* p < 0.05, \*\* p < 0.01, \*\*\* p < 0.001 (two-tailed students t-test).

**Fig. S6.**

**fig. S6. ILC3-restricted MHCII expression is not sufficient to induce proliferation, activation or T<sub>reg</sub> differentiation of naïve CBir1 CD4<sup>+</sup> T cells, but induces antigen-specific deletion of activated T cells in vivo.** **A)** MHCII<sup>pos</sup>, MHCII<sup>neg</sup> and MHCII<sup>ILC3+</sup> mice received sort-purified naïve CFSE-labeled CD45.1<sup>+</sup> CBir1 CD4<sup>+</sup> T cells and were injected with CBir1 peptide i.p. and analyzed for proliferation (CFSE dilution; upper panel) and frequencies of CD4<sup>+</sup> CD45.1<sup>+</sup> CD44<sup>hi</sup>CD62L<sup>lo</sup> effector T cells (T<sub>eff</sub>; middle panel) or CD4<sup>+</sup> CD45.1<sup>+</sup> FoxP3<sup>+</sup> regulatory T cells (T<sub>reg</sub>; lower panel) in the mLN. **B)** Frequencies and **C)** numbers of activated congenic CD90.1<sup>+</sup> OT-II and CD45.1<sup>+</sup> Cbir1 T cells transferred at a 1:1 ratio in the mLN and cLPL of recipient MHCII<sup>neg</sup> or MHCII<sup>ILC3+</sup> mice which received CBir1 peptide. **D)** Cell numbers of transferred CBir1 T cells in the spleen, mLN and cLPL of recipient MHCII<sup>neg</sup> or MHCII<sup>ILC3+</sup> mice one month post-transfer in the absence of exogenously administered CBir1 peptide. All data representative of at least 3 independent experiments with n=2-3 mice per group. Results are shown as the mean +/- s.e.m.

**Fig. S7.**

**fig. S7. CD11c<sup>+</sup> DC-restricted expression of MHCII drives expansion of commensal bacteria-specific T<sub>eff</sub> and T<sub>reg</sub>.** **A)** Expression of MHCII on B220<sup>+</sup> B cells or CD11c<sup>+</sup> DCs in the mLN of CD11c transgenic (CD11cTg) mice (blue line) and MHCII<sup>-/-</sup> mice (grey fill). **B)** Numbers of total CD45.1<sup>+</sup> CBir1 CD4<sup>+</sup> T cells, CD44<sup>+</sup> CD62L<sup>lo</sup> (T<sub>eff</sub>) CBir1 CD4<sup>+</sup> T cells and FoxP3<sup>+</sup> CBir1 CD4<sup>+</sup> T<sub>reg</sub> cells in the mLN (top panel) and cLPL (bottom panel) of CD11cTg mice or MHCII<sup>-/-</sup> mice. All data representative of 2 independent experiments with n=3 mice per group. Results are shown as the mean +/- s.e.m. \* p < 0.05, \*\* p < 0.01 (two-tailed students t-test).

**Fig. S8.**

**fig. S8. ILC3-intrinsic deletion of MHCII results in selective expansion of CD4<sup>+</sup> CBir1 effector T cells in the intestine and associated lymphoid tissue.** (A-C) MHCII <sup>$\Delta$ ILC3</sup> mice and *H2-Ab1*<sup>fl/fl</sup> littermate controls received CD45.1<sup>+</sup> CBir1 Tg CD4<sup>+</sup> T cells that had been sort-purified following pre-activation and were injected with CBir1 peptide i.p. on day 0 and day 1 post transfer. **A)** Frequencies, **B)** numbers and **C)** proliferation (Ki-67) of transferred CBir1 T cells were quantified 0-6 days following antigen administration in the mLN and cLPL. **(D-E)** MHCII <sup>$\Delta$ ILC3</sup> mice and *H2-Ab1*<sup>fl/fl</sup> littermate controls received CD45.1<sup>+</sup> CBir1 Tg CD4<sup>+</sup> T cells that had been sort-purified following pre-activation and were injected with CBir1 peptide i.p. every 2 days post transfer. Frequencies and numbers of total transferred CD4<sup>+</sup> CD45.1<sup>+</sup> T cells, CD4<sup>+</sup> CD45.1<sup>+</sup> CD44<sup>hi</sup> CD62L<sup>lo</sup> effector T cells (T<sub>eff</sub>) or CD4<sup>+</sup> CD45.1<sup>+</sup> FoxP3<sup>+</sup> regulatory T cells (T<sub>reg</sub>) were analyzed in **D)** the colonic lamina propria (cLPL) and **E)** the mLN. All data representative of at least 3 independent experiments with n=2-3 mice per group. N/D = not detected. Results are shown as the mean +/- s.e.m. \* p < 0.05 (two-tailed students t-test).

**Fig. S9.**

**fig. S9. MHCII<sup>+</sup> ILC3 control of commensal bacteria-specific CD4<sup>+</sup> T cells is not mediated via altered homing or suppression of proliferation.** **A)** Frequencies of adoptively transferred activated CD45.1<sup>+</sup> CBir1 and CD90.1<sup>+</sup> OT-II CD4<sup>+</sup> T cells in the spleen of MHCII<sup>neg</sup> and MHCII<sup>ILC3+</sup> mice administered CBir1 antigen at day 9 post transfer. **B)** CFSE dilution and Ki-67 expression of transferred activated CD45.1<sup>+</sup> CBir1 CD4<sup>+</sup> T cells in the mLN of MHCII<sup>neg</sup> (grey fill) or MHCII<sup>ILC3+</sup> mice (blue line) at day 9 post transfer. Data are representative of at least 2 independent experiments with n=3 mice per group.



**Fig. S10.**

**fig. S10. MHCII<sup>+</sup> ILC3s may also control expansion of non-commensal bacteria-specific T cells upon systemic administration of exogenous cognate antigen. A)** Frequencies of congenic CD90.1<sup>+</sup> OT-II cells in the mLN of recipient mice that received OVA peptide i.p. every 2 days following transfer. **B)** Total numbers of OT-II T cells in the mLN, siLPL and cLPL of recipient mice. **C)** Relative cell recovery (%) and frequency of Annexin V<sup>+</sup> cells during *in vitro* co-culture of OT-II T cells and antigen-pulsed ILC3s in the presence or absence of an anti-MHCII neutralizing antibody. Data are representative of 2 independent experiments with 3 mice per group (A-B) or 2 independent experiments with 2-3 biological replicates per group (C). Results are shown as the mean +/- s.e.m. \*\* p < 0.01 (two-tailed students t-test).

**Fig. S11.**

**fig. S11. MHCII<sup>+</sup> ILC3s induce apoptotic cell death in CBir1 CD4<sup>+</sup> T cells.** **A)** Activated CBir1 CD4<sup>+</sup> T cells were co-cultured with ILC3s in the presence or absence of CBir1 antigen and relative cell recovery (%) of either total CD45.1<sup>+</sup> CBir1 CD4<sup>+</sup> T cells or FoxP3<sup>+</sup> CBir1 T<sub>reg</sub> cells were quantified after 48 hours. **B)** Expression of FasL by CCR6<sup>+</sup> ILC3s and **C)** relative cell recovery (%) and **D)** frequency of Annexin V<sup>+</sup> cells during *in vitro* co-culture of CBir1 T cells and ILC3s in the presence or absence of anti-FasL neutralizing antibody. **E)** mLN, PP, siLPL and cLPL lymphocytes (GALT) were pooled and labeled with an SFB-specific MHCII tetramer and frequencies of SFB-specific CD4<sup>+</sup> T cells quantified in C57BL/6, Fas<sup>gld/gld</sup> or *Bim*<sup>-/-</sup> mice. **F)** Representative histograms demonstrating IL-2 binding capacity and **G)** quantification of bound IL-2 MFI of naïve CBir1 CD4<sup>+</sup> T cells (grey), antigen-activated CBir1 CD4<sup>+</sup> T cells (black) and CCR6<sup>+</sup> MHCII<sup>+</sup> ILC3s (blue). **H)** Expression of Bim by wild type CBir1 CD4<sup>+</sup> T cells or CBir1 CD4<sup>+</sup> T cells with a constitutively active STAT-5 signaling molecule following co-culture with Ag-pulsed MHCII<sup>+</sup> ILC3. **I)** Wild type CBir1 CD4<sup>+</sup> T cells or CBir1 STAT5-CA CD4<sup>+</sup> T cells were adoptively transferred into MHCII<sup>neg</sup> or MHCII<sup>ILC3+</sup> mice. Mice were administered CBir1 antigen and numbers of FoxP3<sup>-</sup> CD45.1<sup>+</sup> CBir1 T cells in the mLN were quantified 9 days post transfer. *In vitro* data representative of at least 2 independent experiments with 2-3 biological replicates per culture condition, *in vivo* data representative of at least 2 independent experiments with 3 mice per group. Results are shown as the mean +/- s.e.m. \*\* p < 0.01 (two-tailed students t-test).

**Fig. S12.**

**fig. S12. ILC3 phenotype and frequencies in the intestine of non-IBD and pediatric Crohn's disease patients.** ILC subsets as gated in Fig. 4A were analyzed for expression of the human ILC3 markers **A)** NKp44 and **B)** ROR $\gamma$ t. **C)** Frequencies of c-kit<sup>+</sup> ST2L<sup>-</sup> ILC3s within the Lin<sup>neg</sup> CD127<sup>+</sup> ILC gate were analyzed in right colon biopsies from pediatric Crohn's disease (CD) and non-IBD controls. **(D-E)** HLA-DR expression (MFI) was quantified on **D)** CD4<sup>+</sup> T cells or **E)** CD19<sup>+</sup> CD11c<sup>+</sup> APCs in the same cohort of non-IBD or Crohn's disease patients as depicted in Figure 4. Results are shown as the mean +/- s.e.m. Statistical analyses between patient groups are performed using a Mann-Whitney test \* p < 0.05, \*\* p < 0.01, \*\*\* p < 0.001.

**Fig. S13.**

**fig. S13. Intestinal selection of commensal bacteria-specific CD4<sup>+</sup> T cells.** Thymocytes with specificity for either self or commensal bacteria undergo positive selection through interactions with cortical thymic epithelial cells (cTECs), subsequently differentiate into mature CD4<sup>+</sup> T cells and migrate into the thymic medulla. Once in the medulla self-specific CD4<sup>+</sup> T cells are subject to negative selection through interactions with MHCII<sup>+</sup> medullary thymic epithelial cells (mTECs) and dendritic cells presenting self-antigen. This process of negative selection is mediated by programmed cell death, associated with Nur77 signaling and Bim-dependent apoptosis, which results in the deletion of self antigen-specific CD4<sup>+</sup> T cells prior to entering the periphery. In contrast, CD4<sup>+</sup> T cells specific for commensal bacteria fail to undergo negative selection due to the absence of commensal bacteria-derived antigen in the thymus. Rather, mature commensal bacteria-specific CD4<sup>+</sup> T cells enter the peripheral circulation where they may encounter professional antigen-presenting cells, such as dendritic cells, presenting commensal bacteria-derived antigen via MHCII. Antigen-experienced T<sub>eff</sub><sup>+</sup> then migrate to distinct niches within the lymph node, which are enriched for MHCII<sup>+</sup> ILC3s, resulting in the deletion of activated commensal bacteria-specific T<sub>eff</sub><sup>+</sup> cells from the peripheral pool. Commensal bacteria-specific T cells receive TCR signals from ILC3 MHCII-Ag complexes in the absence of co-stimulation, which is associated with upregulation of the signaling molecule Nur77. In addition, ILC3s efficiently consume growth factor cytokines, in particular IL-2, resulting in T cell cytokine withdrawal. The net effect of both TCR signaling and cytokine withdrawal results in upregulation of the pro-apoptotic Bim and induction of Caspase-3 associated apoptotic cell death, promoting deletion of activated commensal bacteria-specific T cells in a process we term “intestinal selection”, which parallels thymic selection. In contrast, commensal bacteria-specific CD4<sup>+</sup> T regulatory cells (T<sub>reg</sub><sup>+</sup>) are not subject to ILC3-mediated deletion, potentially due to their ability to compete for IL-2, and migrate to the intestine whereby they further maintain tissue homeostasis in the presence of the commensal microflora.
